# Supplementary material for: Bifunctional ordered mesoporous materials: direct synthesis and study of the distribution of two distinct functional groups in the pore channels
Source: Royal Society of Chemistry journal article supplement (doi:10.1039/b807793b), 2008-01-01
Supplement: b807793b.pdf [file b807793b.pdf]

## Bifunctional Ordered Mesoporous Materials. Direct synthesis and study of the distribution of two distinct functional groups in the pore channels

Rola Mouawia, Ahmad Mehdi,\* Catherine Reyé, Robert J.P. Corriu

*Institut Charles Gerhardt, Chimie Moléculaire et Organisation du Solide, Université Montpellier, cc 1701.  
Place E. Bataillon, 34095 Montpellier Cedex 5 France. Fax: 33 4 6714 3852; Tel: 33 4 6714 3038.  
E-mail : [ahmad.mehdi@univ-montp2.fr](mailto:ahmad.mehdi@univ-montp2.fr)*

### Electronic Supplementary Information

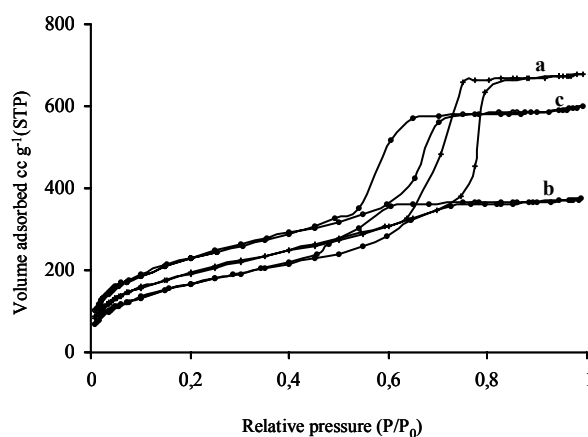

Figure 1S Nitrogen adsorption-desorption isotherms of SBA-<sup>10</sup>acac (a), SBA-<sup>10</sup>SH (b) and SBA-<sup>14</sup>acac,SH (c).

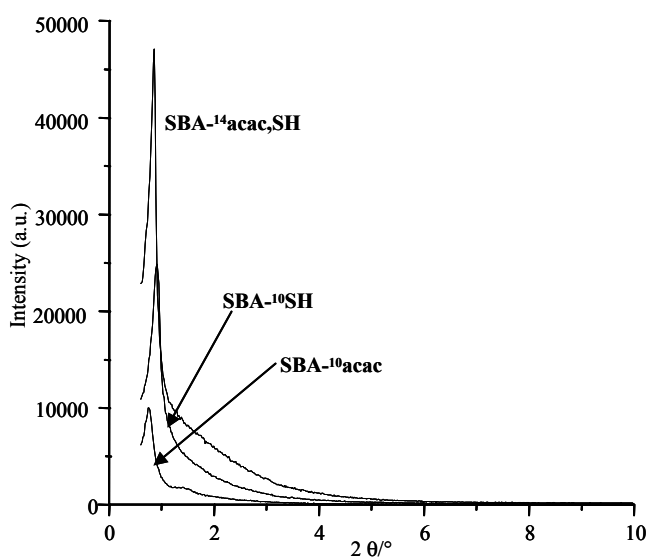

Figure 2S XRD patterns of SBA-<sup>10</sup>acac, SBA-<sup>10</sup>SH and SBA-<sup>14</sup>acac,SH.

**Table S1.** Composition and physicochemical characteristics of materials **SBA<sup>x</sup>-acac**, **SBA<sup>x</sup>-SH**, **SBA<sup>x</sup>-CN** and **SBA<sup>x</sup>-NH<sub>2</sub>**

| entry | sample                                 | $a_0(\text{nm})^a$ | $S_{\text{BET}}$<br>( $\text{m}^2 \text{g}^{-1}$ ) | $V_p$<br>( $\text{cm}^3 \text{g}^{-1}$ ) | $D_p^b$<br>(nm) | $d_{100}$<br>(nm) | Wall thickness <sup>c</sup><br>(nm) | Si/Z <sup>d</sup> | Org. group content<br>( $\text{mmol g}^{-1}$ ) |
|-------|----------------------------------------|--------------------|----------------------------------------------------|------------------------------------------|-----------------|-------------------|-------------------------------------|-------------------|------------------------------------------------|
| 1     | <b>SBA<sup>5</sup>-acac</b>            | 14.90              | 763                                                | 1.28                                     | 7.44            | 12.90             | 7.46                                | Z = C 0.92 (1.07) | 0.71                                           |
| 2     | <b>SBA<sup>10</sup>-acac</b>           | 13.30              | 675                                                | 1.04                                     | 6.87            | 11.50             | 6.43                                | Z = C 0.41 (0.51) | 1.30                                           |
| 3     | <b>SBA<sup>14</sup>-acac</b>           | 9.20               | 600                                                | 0.70                                     | 6.25            | 8.00              | 2.95                                | Z = C 0.24 (0.37) | 1.70                                           |
| 4     | <b>SBA<sup>5</sup>-SH</b>              | 13.80              | 669                                                | 0.90                                     | 5.26            | 11.90             | 8.54                                | Z = S 19.12 (20)  | 0.74                                           |
| 5     | <b>SBA<sup>10</sup>-SH</b>             | 10.90              | 583                                                | 0.58                                     | 3.85            | 9.50              | 7.05                                | Z = S 8.98 (10)   | 1.30                                           |
| 6     | <b>SBA<sup>14</sup>-SH</b>             | 10.20              | 569                                                | 0.44                                     | 3.20            | 8.80              | 7.00                                | Z = S 5.80 (7)    | 1.92                                           |
| 7     | <b>SBA<sup>5</sup>-CN</b>              | 13.72              | 710                                                | 1.50                                     | 8.57            | 11.82             | 5.15                                | Z = N 18.99 (20)  | 0.73                                           |
| 8     | <b>SBA<sup>10</sup>-CN</b>             | 13.55              | 628                                                | 1.26                                     | 7.67            | 11.73             | 5.88                                | Z = N 8.80 (10)   | 1.32                                           |
| 9     | <b>SBA<sup>14</sup>-CN</b>             | 12.20              | 532                                                | 1.06                                     | 5.74            | 10.56             | 6.73                                | Z = N 5.89 (7)    | 1.85                                           |
| 10    | <b>SBA<sup>5</sup>-NH<sub>2</sub></b>  | 12.4               | 524                                                | 1.37                                     | 8.38            | 10.74             | 4.02                                | Z = N 23.31 (20)  | 0.52                                           |
| 11    | <b>SBA<sup>10</sup>-NH<sub>2</sub></b> | 12.08              | 563                                                | 1.11                                     | 6.37            | 10.47             | 5.71                                | Z = N 12.79 (10)  | 1.00                                           |
| 12    | <b>SBA<sup>14</sup>-NH<sub>2</sub></b> | 10.84              | 583                                                | 1.10                                     | 5.30            | 9.38              | 5.54                                | Z = N 8.71 (7)    | 1.50                                           |

<sup>a</sup>Lattice spacing. <sup>b</sup>Calculated from the desorption branch by the BJH method. <sup>c</sup>Calculated by  $a_0$  – pore size ( $a_0 = 2d_{100} / 3^{1/2}$ ). <sup>d</sup>Calculated from elemental analyses. In parentheses, theoretical values.

**Table 2S.** Composition and physicochemical characteristics of materials **SBA<sup>5</sup>-CO<sub>2</sub>H** and **SBA<sup>5</sup>-SO<sub>3</sub>H**

| sample                                  | $a_0^a$ (nm) | $S_{\text{BET}}$ (m <sup>2</sup> g <sup>-1</sup> ) | $V_p$ (cm <sup>3</sup> g <sup>-1</sup> ) | $D_p^b$ (nm) | $d_{100}$ (nm) | Wall thickness <sup>c</sup> (nm) | Si/Z <sup>d</sup> |
|-----------------------------------------|--------------|----------------------------------------------------|------------------------------------------|--------------|----------------|----------------------------------|-------------------|
| <b>SBA<sup>5</sup>-CO<sub>2</sub>H</b>  | 13.29        | 633                                                | 1.45                                     | 8.91         | 11.5           | 4.38                             | Z = C 5.2 (5)     |
| <b>SBA<sup>10</sup>-CO<sub>2</sub>H</b> | 13.20        | 531                                                | 1.26                                     | 8.67         | 11.44          | 4.53                             | Z = C 1.9 (2.5)   |
| <b>SBA<sup>14</sup>-CO<sub>2</sub>H</b> | 10.75        | 399                                                | 0.89                                     | 6.01         | 9.35           | 4.74                             | Z = C 1.6 (1.75)  |
| <b>SBA<sup>5</sup>-SO<sub>3</sub>H</b>  | 13.06        | 642                                                | 0.75                                     | 4.87         | 11.3           | 8.19                             | Z = S 19.78 (20)  |
| <b>SBA<sup>10</sup>-SO<sub>3</sub>H</b> | 10.64        | 537                                                | 0.41                                     | 2.94         | 9.21           | 7.70                             | Z = S 10.5 (10)   |
| <b>SBA<sup>14</sup>-SO<sub>3</sub>H</b> | 9.89         | 499                                                | 0.37                                     | 2.43         | 8.56           | 7.46                             | Z = S 6.45 (7)    |

<sup>a</sup>Lattice spacing. <sup>b</sup>Calculated from the desorption branch by the BJH method. <sup>c</sup>Calculated by  $a_0$  – pore size ( $a_0 = 2d_{100} / 3^{1/2}$ ). <sup>d</sup>Calculated from elemental analyses. In parentheses, theoretical values.

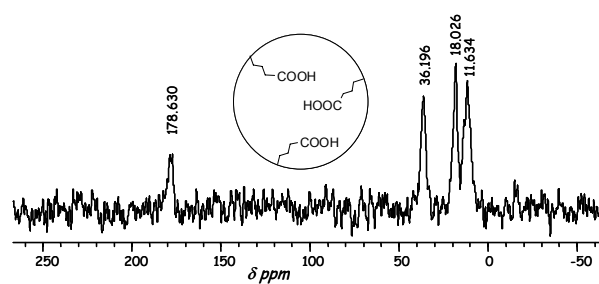

Fig. 3S CP-MAS <sup>13</sup>C NMR spectrum of SBA<sup>10</sup>-COOH.
